# Supplementary material for: Viscosity-sensitive and AIE-active bimodal fluorescent probe for the selective detection of OCl− and Cu2+: a dual sensing approach via DFT and biological studies using green gram seeds
Source: Royal Society of Chemistry journal article supplement (doi:10.1039/d3ay01971c), 2023-12-20
Supplement: d3ay01971c1.pdf [file d3ay01971c1.pdf]

# Viscosity-sensitive and AIE-active bimodal fluorescent probe for the selective detection of $\text{OCl}^-$ and $\text{Cu}^{2+}$ : a dual sensing approach *via* DFT and biological studies using green gram seeds

Malavika S Kumar<sup>a</sup>, Vishnu S<sup>a</sup>, Malay Dolai<sup>b</sup>, Anish Nag<sup>c</sup>, Yatheesharadhya bylappa<sup>c</sup>, Avijit Kumar Das<sup>\*a</sup>

<sup>a</sup>Department of Chemistry, CHRIST (Deemed to be University), Hosur Road, Bangalore, Karnataka, 560029 India, Email: avijitkumar.das@christuniversity.in

<sup>b</sup>Department of Chemistry, Prabhat Kumar College, Contai, Purba Medinipur 721404, W.B., India

<sup>d</sup> Department of Life Science, CHRIST (Deemed to be University), Hosur Road, Bangalore, Karnataka, 560029

## CONTENTS

|                                                                                 |     |
|---------------------------------------------------------------------------------|-----|
| 1. General methods of UV-vis and fluorescence titration experiments .....       | 1   |
| 2. Association constant determination.....                                      | 2-3 |
| 3. Determination of fluorescence quantum yields.....                            | 3   |
| 4. Calculation of the detection limit.....                                      | 4   |
| 5. Job's plot analysis.....                                                     | 5   |
| 6. DLS analysis.....                                                            | 5   |
| 7. Rate constant calculation.....                                               | 6   |
| 8. <sup>1</sup> H NMR and Mass spectrum of NCP.....                             | 7   |
| 9. <sup>13</sup> C-NMR and IR spectrum of NCP.....                              | 8   |
| 10. <sup>1</sup> H-NMR analysis of NCP and NCP + $\text{OCl}^-$ .....           | 9   |
| 11. Mass spectra of NCP + $\text{OCl}^-$ and NCP + $\text{Cu}^{2+}$ .....       | 9   |
| 12. Computational details.....                                                  | 10  |
| 13. Comparison table of NCP with the reported similar type of chemosensors..... | 11  |
| 14. References.....                                                             | 12  |

## **General method of UV-vis and fluorescence titration:**

### **By UV-vis method:**

For UV-vis titrations, a stock solution of the sensor was prepared ( $c = 2 \times 10^{-5}$  M) in a CH<sub>3</sub>CN-HEPES buffer (9/1, v/v, 25°C) at pH 7.4. Solutions of the guest interfering analytes, such as Cl<sup>-</sup>, CH<sub>3</sub>COO<sup>-</sup>, Br<sup>-</sup>, F<sup>-</sup>, NO<sub>2</sub><sup>-</sup>, C<sub>2</sub>O<sub>4</sub><sup>2-</sup>, NO<sub>3</sub><sup>-</sup>, SO<sub>4</sub><sup>2-</sup>, H<sub>2</sub>O<sub>2</sub>, Al<sup>3+</sup>, Cd<sup>2+</sup>, Fe<sup>3+</sup>, Fe<sup>2+</sup>, Hg<sup>2+</sup>, Mn<sup>2+</sup>, Cu<sup>2+</sup>, Ni<sup>2+</sup>, Pb<sup>2+</sup>, and Zn<sup>2+</sup>, were also prepared in the order of  $c = 2 \times 10^{-4}$  M. Solutions of different concentrations containing sensors and increasing concentrations of cations were prepared separately. The spectra of these solutions were recorded by means of UV-vis methods.

### **General procedure for drawing Job's plot by UV-vis method:**

A stock solution of the same concentration of NCP and Cu<sup>2+</sup> was prepared in the order of  $\approx 2.0 \times 10^{-5}$  M in a CH<sub>3</sub>CN-HEPES buffer (9/1, v/v, 25°C) at pH 7.4. The absorbance in each case with different *host-guest* ratios but equal volumes was recorded. Job plots were drawn by plotting  $\Delta I \cdot X_{\text{host}}$  vs  $X_{\text{host}}$  ( $\Delta I$  = change in the intensity of the absorbance spectrum during titration and  $X_{\text{host}}$  is the mole fraction of the host in each case, respectively).

### **By fluorescence method:**

For fluorescence titrations, a stock solution of the sensor ( $c = 2 \times 10^{-5}$  M) was prepared for the titration of cations and anions in a CH<sub>3</sub>CN-HEPES buffer (9/1, v/v, 25°C) at pH 7.4. Solution of the guest cations and anions in the order of  $2 \times 10^{-4}$  M were also prepared. Solutions of different concentrations containing sensors and increasing concentrations of cations and anions were prepared separately. The spectra of these solutions were recorded by means of fluorescence methods.

### **Association constant determination:**

The binding constant value of cation Cu<sup>2+</sup> with the sensor was determined from the emission intensity data following the modified Benesi-Hildebrand equation,  $1 / \Delta I = 1 / \Delta I_{\text{max}} + (1 / K[C]) (1 / \Delta I_{\text{max}})$ , where  $K$  is the binding constant,  $[C]$  is the guest concentration,  $\Delta I = I - I_{\text{min}}$  and  $\Delta I_{\text{max}} = I_{\text{max}} - I_{\text{min}}$ , in which  $I_{\text{min}}$ ,  $I$ , and  $I_{\text{max}}$  are the emission intensities of the sensor considered in the absence of the guest, at an intermediate concentration and at a concentration of complete saturation of the guest. From the plot of  $(I_{\text{max}} - I_{\text{min}})/(I - I_{\text{min}})$  against  $[C]^{-1}$  for the sensor, the value of  $K$  was determined from the slope. The association constant ( $K_a$ ) as determined by the fluorescence titration method for the sensor with Cu<sup>2+</sup> was found to be  $1.66 \times 10^3 \text{ M}^{-1}$  (error < 10%).

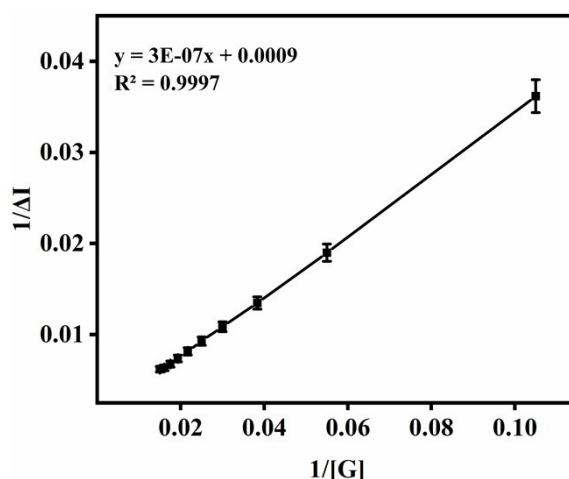

**Fig. S1:** Benesi–Hildebrand plot from fluorescence titration data of receptor **NCP** ( $c = 2.0 \times 10^{-5}$  M) with  $\text{Cu}^{2+}$  including error bars (error amount, 5%; Y error bar for both  $[\pm]$  deviation).

**Determination of fluorescence quantum yields:**

Here, the quantum yield  $\phi$  was measured using the following equation:

$$\phi_x = \phi_s (F_x / F_s)(A_s / A_x)(n_x^2 / n_s^2)$$

where

X and S indicate the unknown and standard solutions, respectively,  $\phi$  is the quantum yield, F is the area under the emission curve, A is the absorbance at the excitation wave length, and n is the index of refraction of the solvent. Here  $\phi$  measurements were performed using anthracene in ethanol as the standard [ $\phi = 0.27$ ] (error  $\sim 10\%$ )

**Calculation of the detection limit:**

The detection limit (DL) of **NCP** for  $\text{OCl}^-$  and  $\text{Cu}^{2+}$  was determined using the following equation:

$$DL = K * Sb_1 / S$$

where  $K = 2$  or  $3$  (we take  $3$  in this case),  $Sb_1$  is the standard deviation of the blank solution, and S is the slope of the calibration curve.

From the graph shown in Fig. S2, we get a slope value of  $1.091$ , and the  $Sb_1$  value is  $1.4464$

From the graph shown in Fig. S3, we get a slope value of  $38.797$ , and the  $Sb_1$  value is  $7.0684$ .

Thus, using the formula we get the detection limit for  $\text{Cu}^{2+}$  as  $3.97 \mu\text{M}$  and for  $\text{OCl}^-$  as  $0.55 \mu\text{M}$ .

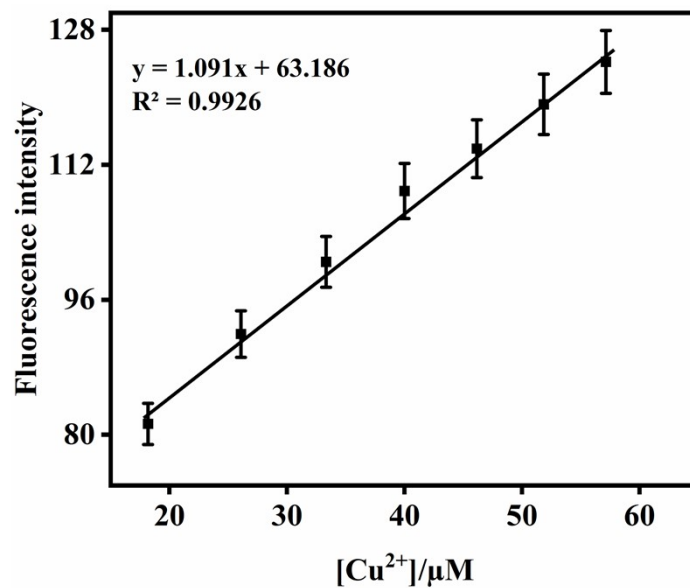

**Fig. S2:** Changes in the fluorescence intensity of NCP as a function of [Cu<sup>2+</sup>], including error bars (error amount, 5%; Y error bar for both [ $\pm$ ] deviation).

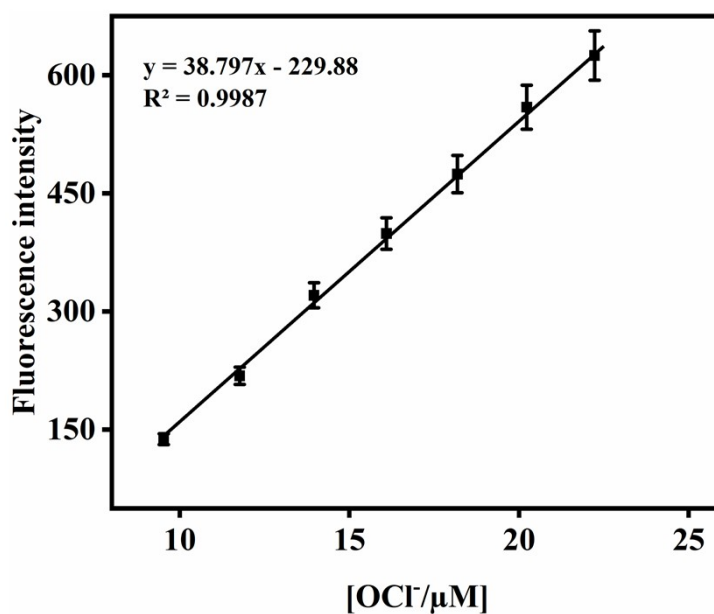

**Fig. S3:** Changes in the fluorescence intensity of NCP as a function of [OCl<sup>-</sup>], including error bars (error amount, 5%; Y error bar for both [ $\pm$ ] deviation).

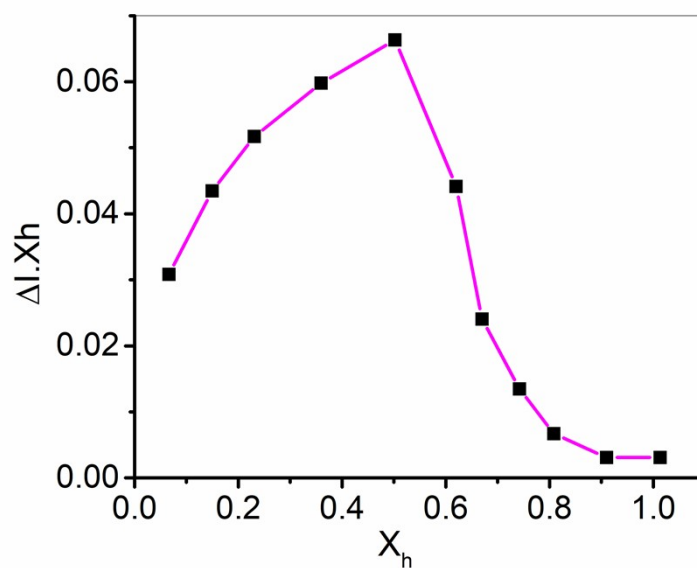

**Fig. S4.** Job plot diagram of receptor **NCP** for  $\text{Cu}^{2+}$  (where  $X_h$  is the mole fraction of the host and  $\Delta I$  indicates the change in the intensity).

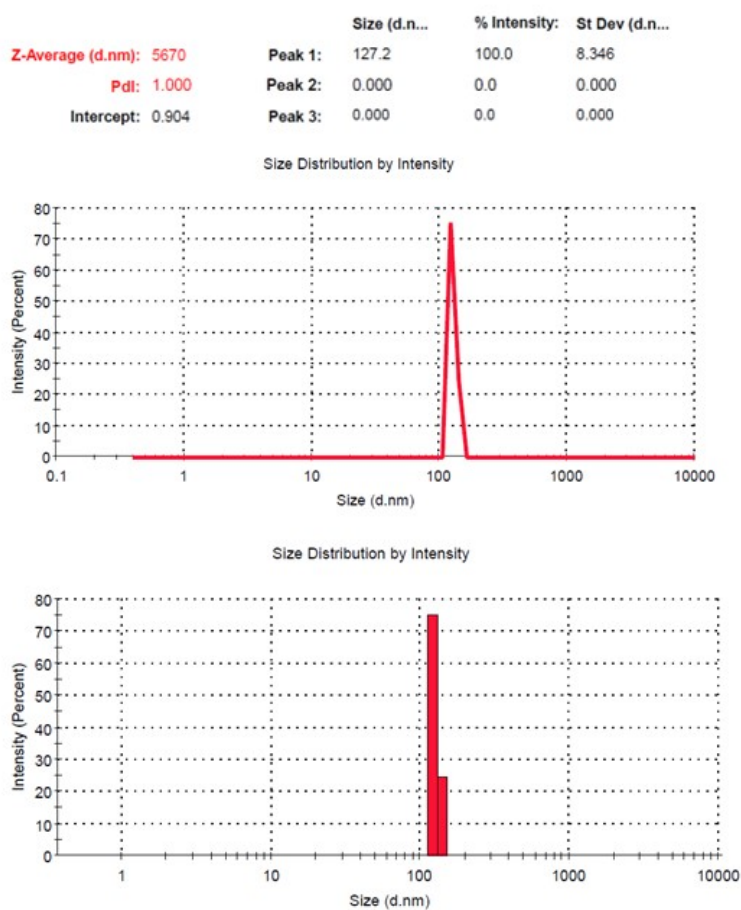

**Fig. S5.** Results of DLS analysis of **NCP** in  $\text{CH}_3\text{CN} : \text{H}_2\text{O}$  (9 : 1).

The changes in the emission curve of NCP ( $c = 2 \times 10^{-5} \text{M}$ ) at different time intervals by the addition of  $\text{OCl}^-$  ( $c = 2 \times 10^{-4}$ ) and calculation of the first-order rate constant:

Fig. S6 represents the changes in the emission intensity at different time intervals by the addition of hypochlorite. From the time vs. fluorescent intensity plot at a fixed wavelength of 438 nm using the first-order rate equation, we get the rate constant  $K = \text{slope} \times 2.303 = 11.807 \times 2.303 = 27.192 \text{ Sec}^{-1}$

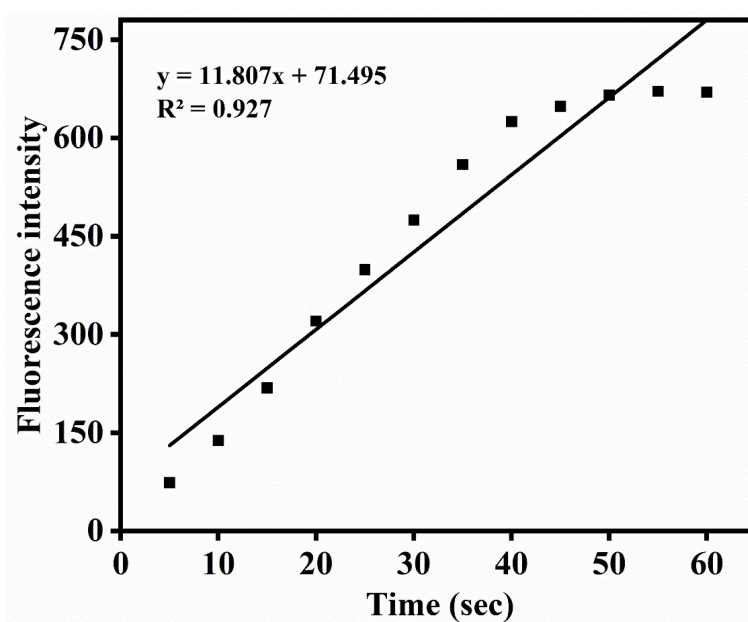

Fig. S6. First-order rate equation using time vs. fluorescent intensity plot at 438 nm.

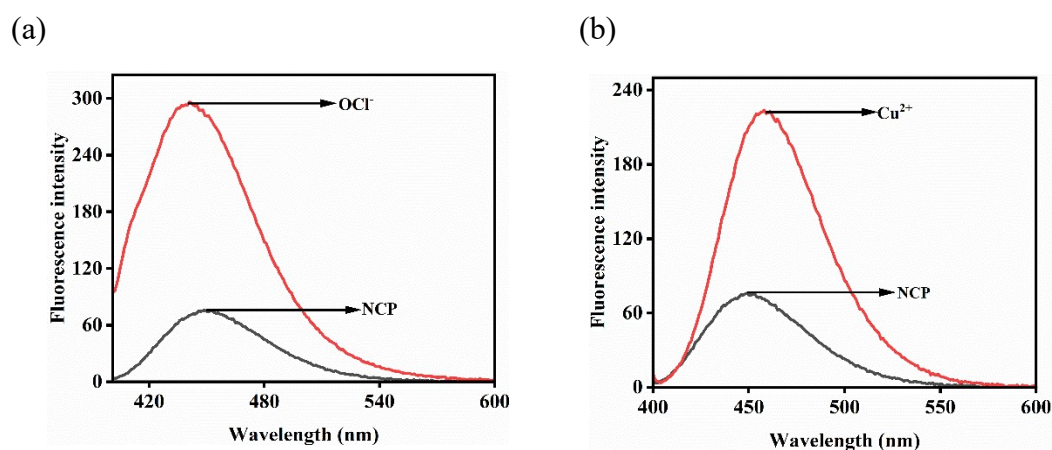

Fig. S7. (a) and (b) Fluorescence titration spectra of NCP ( $c = 2.0 \times 10^{-5} \text{M}$ ) in the presence of  $\text{OCl}^-$  and  $\text{Cu}^{2+}$  respectively ( $c = 2.0 \times 10^{-4} \text{M}$ ) in a  $\text{CH}_3\text{CN}/\text{HEPES}$  buffer (50 : 50, v/v, pH 7.4).

**<sup>1</sup>H NMR spectrum (Fig. S8) of NCP:**

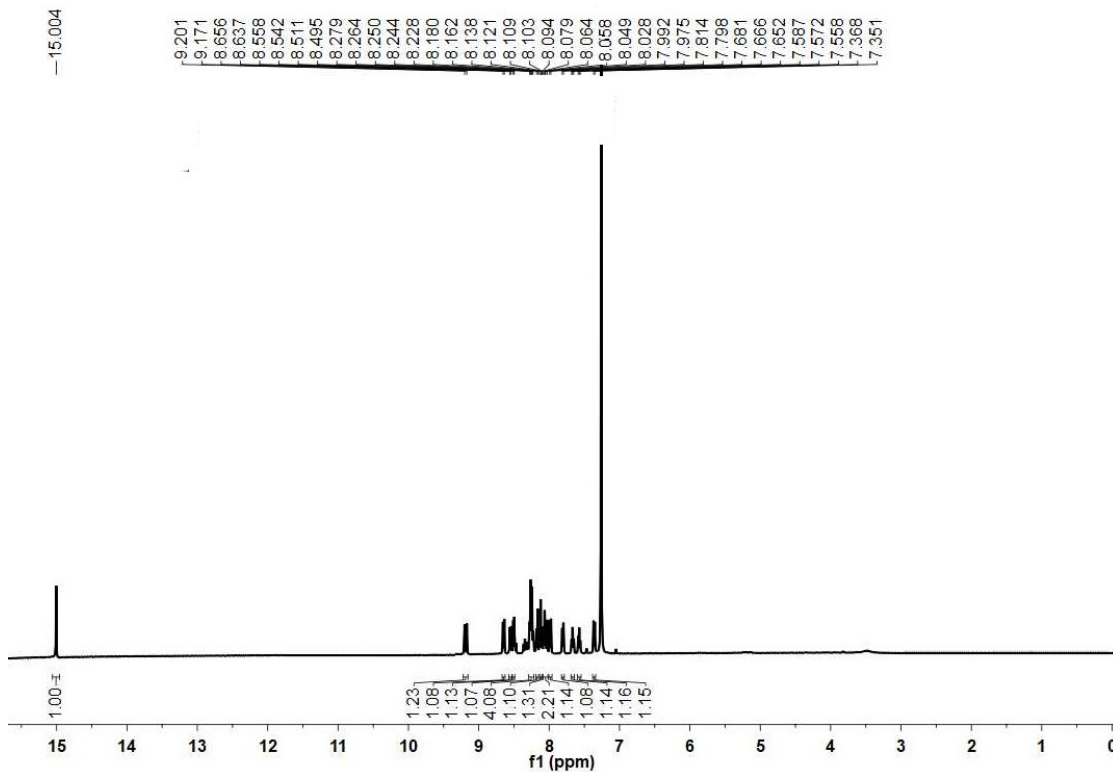

**Mass spectrum (Fig. S9) of NCP:**

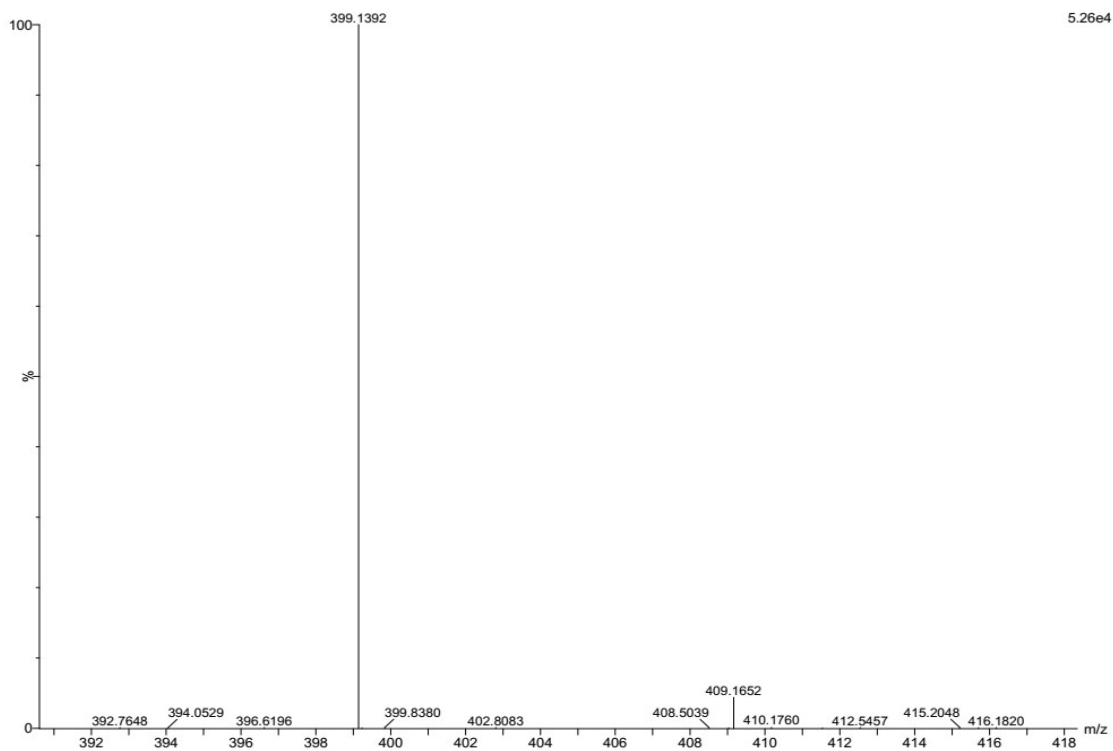

**$^{13}\text{C}$ -NMR spectrum (Fig. S10) of NCP:**

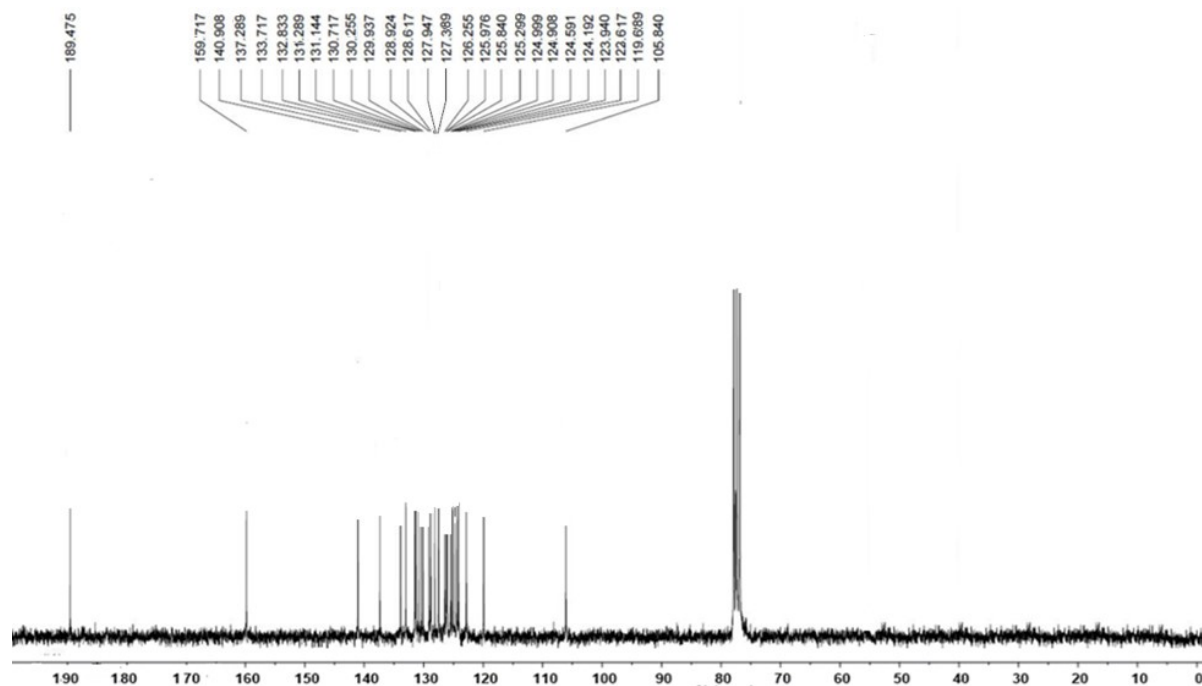

**IR spectrum of NCP (Fig. S11):**

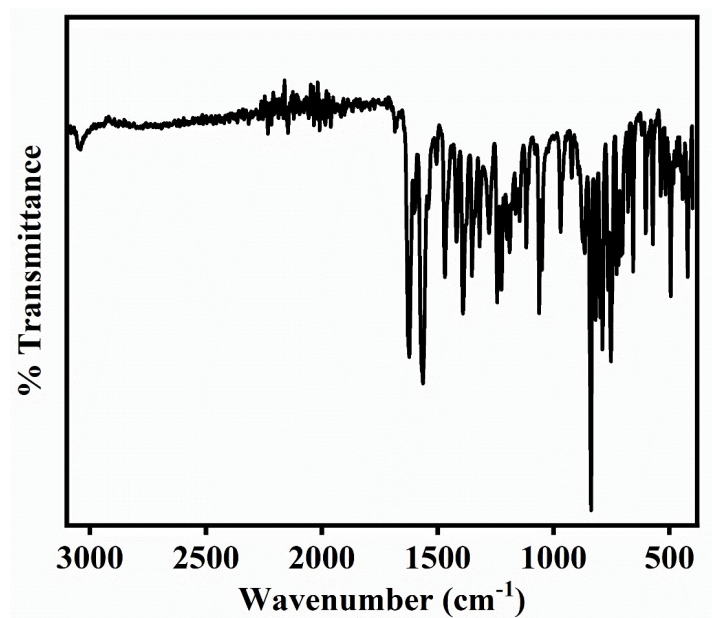



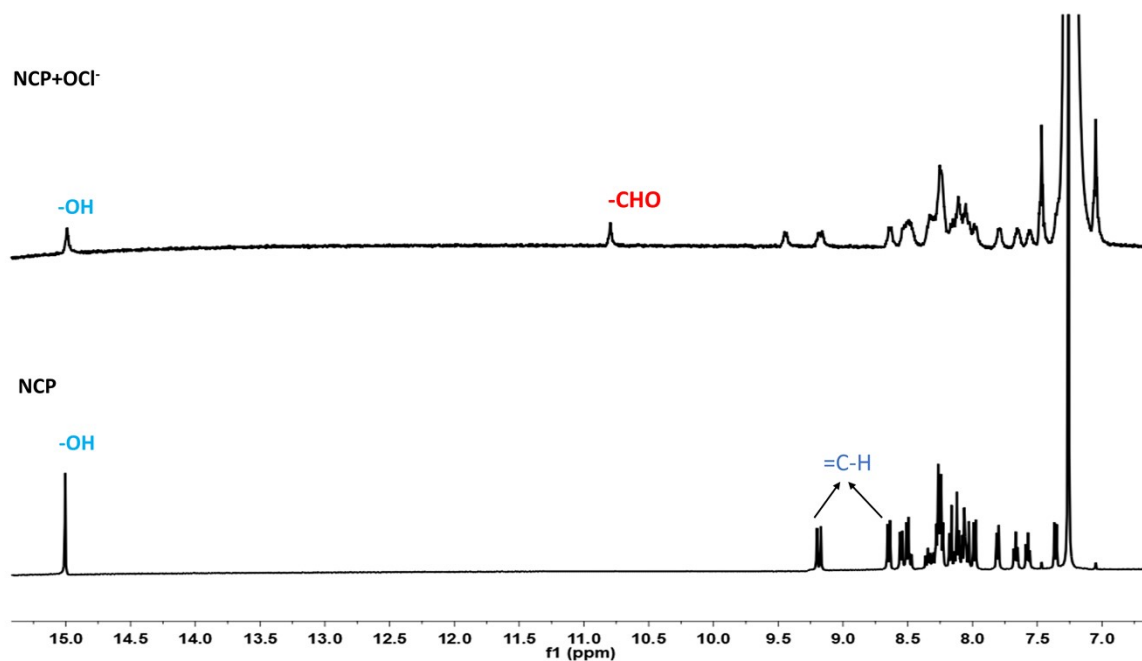

Fig. S12. <sup>1</sup>H-NMR analysis of NCP and NCP + OCl<sup>-</sup>.

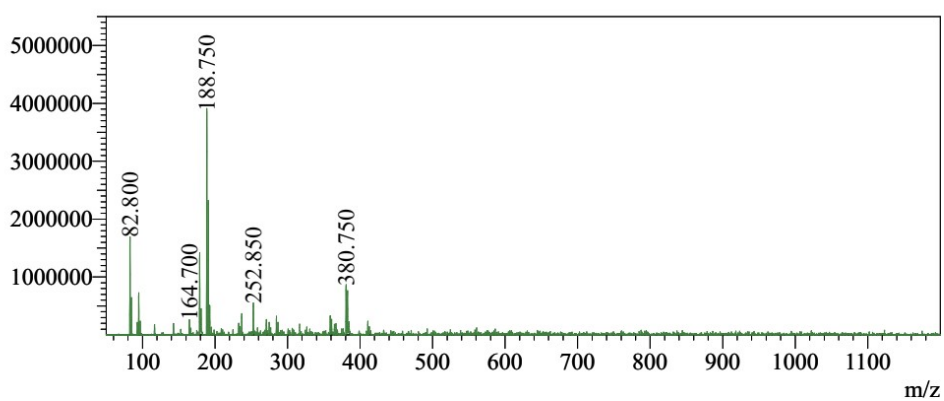

Fig. S13. Mass spectra of NCP + OCl<sup>-</sup>.

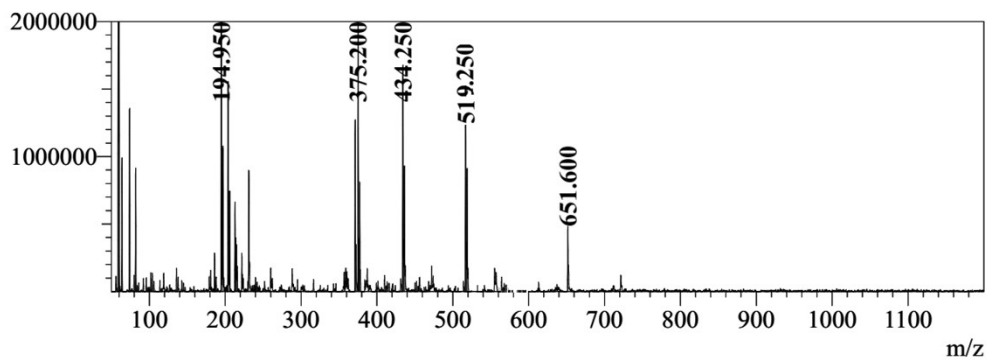

Fig. S14. Mass spectra of NCP + Cu<sup>2+</sup>.

## Computational details

Ground-state electronic structure calculations in the gas phase of the complexes were carried out using the DFT<sup>1</sup> method associated with the conductor-like polarizable continuum model (CPCM).<sup>2</sup> Becke's hybrid function<sup>3</sup> with the Lee-Yang-Parr (LYP) correlation function<sup>4</sup> was used for the study. The absorbance spectral properties in a DMSO medium for **HL** and **1** were calculated by the time-dependent density functional theory (TDDFT)<sup>5</sup> associated with the conductor-like polarizable continuum model and we computed the lowest 40 singlet – singlet transition.

For H atoms, we used the 6-31+(g) basis set; for C, N, O, and Cu atoms, we employed LanL2DZ as the basis set for all the calculations. The calculated electron-density plots for frontier molecular orbitals were prepared using the Gauss View 5.1 software. All the calculations were performed using the Gaussian 09W software package.<sup>6</sup> The Gauss Sum 2.1 program<sup>7</sup> was used to calculate the molecular orbital contributions from groups or atoms.

**Table S1:** Comparison table of **NCP** with the reported similar types of chemosensors

| Ligands                                                                             | Analytes                                                     | Solvent used                                                                           | Probe type | Detection limit                                                      | Applications                                        | References       |
|-------------------------------------------------------------------------------------|--------------------------------------------------------------|----------------------------------------------------------------------------------------|------------|----------------------------------------------------------------------|-----------------------------------------------------|------------------|
| 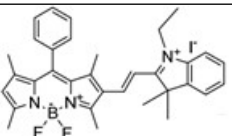   | OCl <sup>-</sup> and viscosity                               | CH <sub>3</sub> CN-H <sub>2</sub> O<br>(Sensing)<br>Glycerol<br>(Viscosity)            | Turn on    | 28 nM                                                                | Cell imaging                                        | [8]              |
|    | OCl <sup>-</sup> and viscosity                               | H <sub>2</sub> O<br>(Sensing)<br>glycerol<br>(Viscosity)                               | Turn on    | 19.4 nM                                                              | Cell imaging                                        | [9]              |
|    | OCl <sup>-</sup> and Cu <sup>2+</sup>                        | DMSO/PBS,<br>CH <sub>3</sub> CN/PBS<br>buffer                                          | Turn on    | 0.44 μM                                                              | Cell imaging                                        | [10]             |
|   | OCl <sup>-</sup> and Cu <sup>2+</sup>                        | CH <sub>3</sub> CN-H <sub>2</sub> O                                                    | Turn on    | -                                                                    | Logic gates                                         | [11]             |
|  | OCl <sup>-</sup> and AIE                                     | DMF-H <sub>2</sub> O                                                                   | Turn on    | 0.39 μM                                                              | Cell imaging                                        | [12]             |
|  | OCl <sup>-</sup> and Cu <sup>2+</sup> ,<br>AIE,<br>viscosity | CH <sub>3</sub> CN-H <sub>2</sub> O<br>(Sensing and<br>AIE)<br>Glycerol<br>(Viscosity) | Turn on    | 3.97 μM<br>(Cu <sup>2+</sup> )<br>and 0.55<br>μM (OCl <sup>-</sup> ) | DFT<br>SEM<br>Cell<br>Imaging<br>Dipstick<br>method | <b>This work</b> |

## 10. References:

- 1 R. G. Parr and W. Yang, *Density Functional Theory of Atoms and Molecules*, Oxford University Press, Oxford, 1989.
- 2 (a) V. Barone and M. Cossi, *J. Phys. Chem. A*, 1998, **102**, 1995; (b) M. Cossi and V. Barone, *J. Chem. Phys.*, 2001, **115**, 4708; (c) M. Cossi, N. Rega, G. Scalmani and V. Barone, *J. Comp. Chem.*, 2003, **24**, 669.
- 3 A. D. Becke, *J. Chem. Phys.*, 1993, **98**, 5648.
- 4 C. Lee, W. Yang and R. G. Parr, *Phys. Rev. B*, 1998, **37**, 785.
- 5 M. E. Casida, C. Jamorosi, K. C. Casida and D. R. Salahub, *J. Chem. Phys.*, 1998, **108**, 4439; R. E. Stratmann, G. E. Scuseria, M. J. Frisch, *J. Chem. Phys.*, 1998, **109**, 8218; R. Bauernschmitt and R. Ahlrichs, *Chem. Phys. Lett.*, 1996, **256**, 454.
- 6 M. J. Frisch, G. W. Trucks, H. B. Schlegel, G. E. Scuseria, M. A. Robb, J. R. Cheeseman, G. Scalmani, V. Barone, B. Mennucci, G. A. Petersson, H. Nakatsuji, M. Caricato, X. Li, H. P. Hratchian, A. F. Izmaylov, J. Bloino, G. Zheng, J. L. Sonnenberg, M. Hada, M. Ehara, K. Toyota, R. Fukuda, J. Hasegawa, M. Ishida, T. Nakajima, Y. Honda, O. Kitao, H. Nakai, T. Vreven, J. A. Montgomery Jr., J. E. Peralta, F. Ogliaro, M. Bearpark, J. J. Heyd, E. Brothers, K. N. Kudin, V. N. Staroverov, R. Kobayashi, J. Normand, K. Raghavachari, A. Rendell, J. C. Burant, S. S. Iyengar, J. Tomasi, M. Cossi, N. Rega, J. M. Millam, M. Klene, J. E. Knox, J. B. Cross, V. Bakken, C. Adamo, J. Jaramillo, R. Gomperts, R. E. Stratmann, O. Yazyev, A. J. Austin, R. Cammi, C. Pomelli, J. W. Ochterski, R. L. Martin, K. Morokuma, V. G. Zakrzewski, G. A. Voth, P. Salvador, J. J. Dannenberg, S. Dapprich, A. D. Daniels, Ö. Farkas, J. B. Foresman, J. V. Ortiz, J. Cioslowski and D. J. Fox, Gaussian Inc., 2009, Wallingford CT.
- 7 N. M. O'Boyle, A. L. Tenderholt and K. M. Langner, *J. Comp. Chem.*, 2008, **29**, 839.
- 8 X. Wang, F. Song and X. Peng, *Dyes Pigm.*, 2016, **125**, 89–94.
- 9 L. Liang, Y. Sun, C. Liu, X. Jiao, Y. Shang, X. Zeng, L. Zhao and J. Zhao, *J. Mol. Struct.*, 2021, **1227**, 129523.
- 10 Y. Feng, S. Li, D. Li, Q. Wang, P. Ning, M. Chen, X. Tian and X. Wang, *Sens. Actuators B Chem.*, 2018, **254**, 282–290.
- 11 X. Xie, X. Chen, B. Li and L. Zhang, *Dyes Pigm.*, 2013, **98**, 422–427.
- 12 S. Li, Y. Zeng, C. Tang, F. Wang, B. Gu and S. Tang, *Spectrochim. Acta A Mol. Biomol. Spectrosc.*, 2022, **281**, 121601.
